# Supplementary material for: Self-reproducing machines
Source: Springer Nature journal article supplement (doi:10.1038/435163a), 2005-05-01
Supplement: 41586_2005_BF435163a_MOESM1_ESM.pdf [file 41586_2005_BF435163a_MOESM1_ESM.pdf]

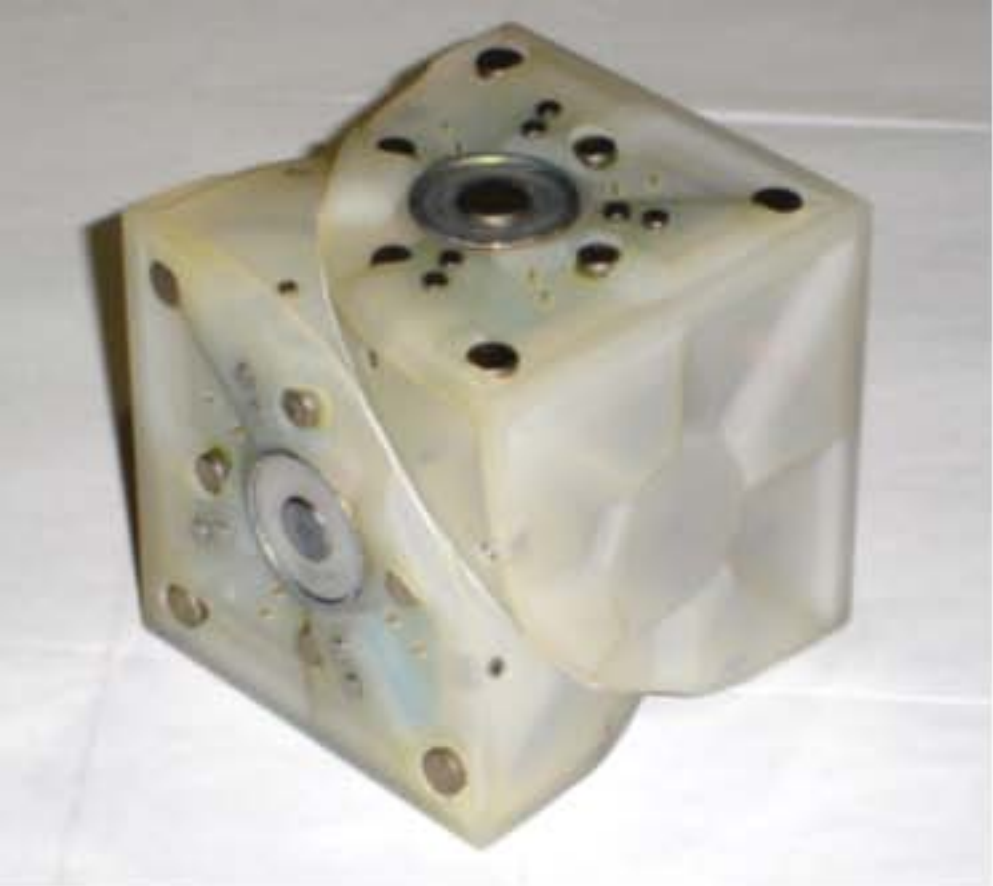

(a)

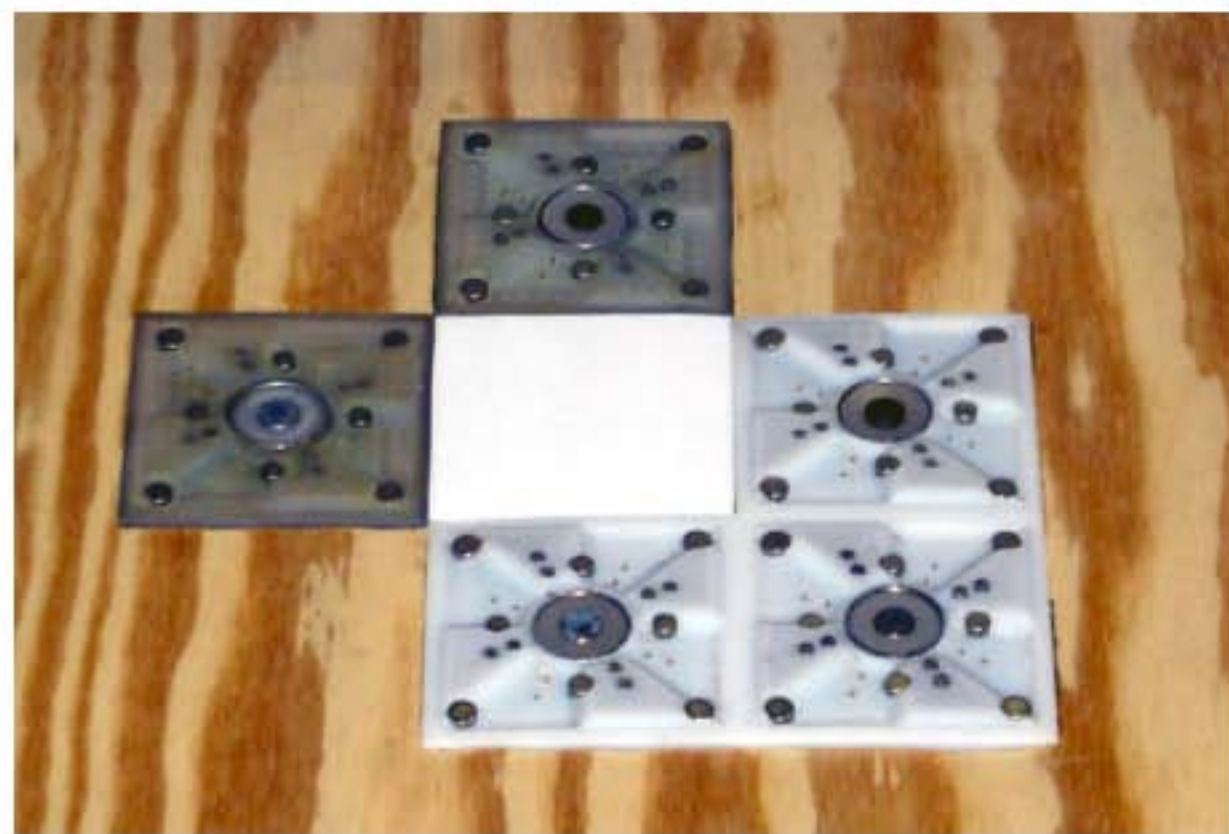

(b)

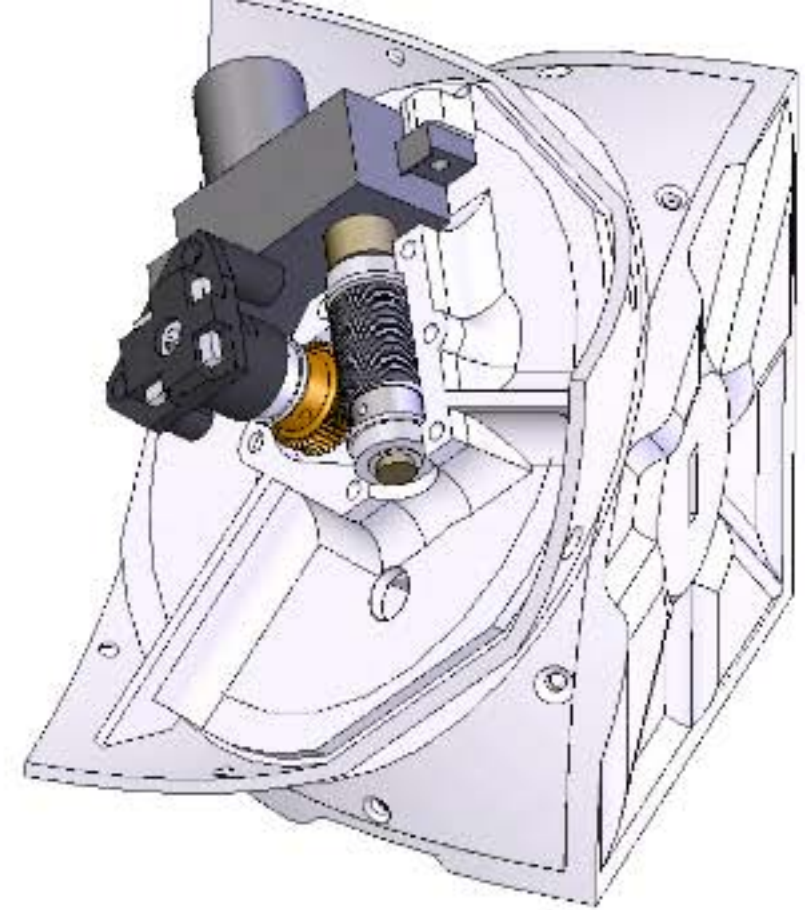

(c)

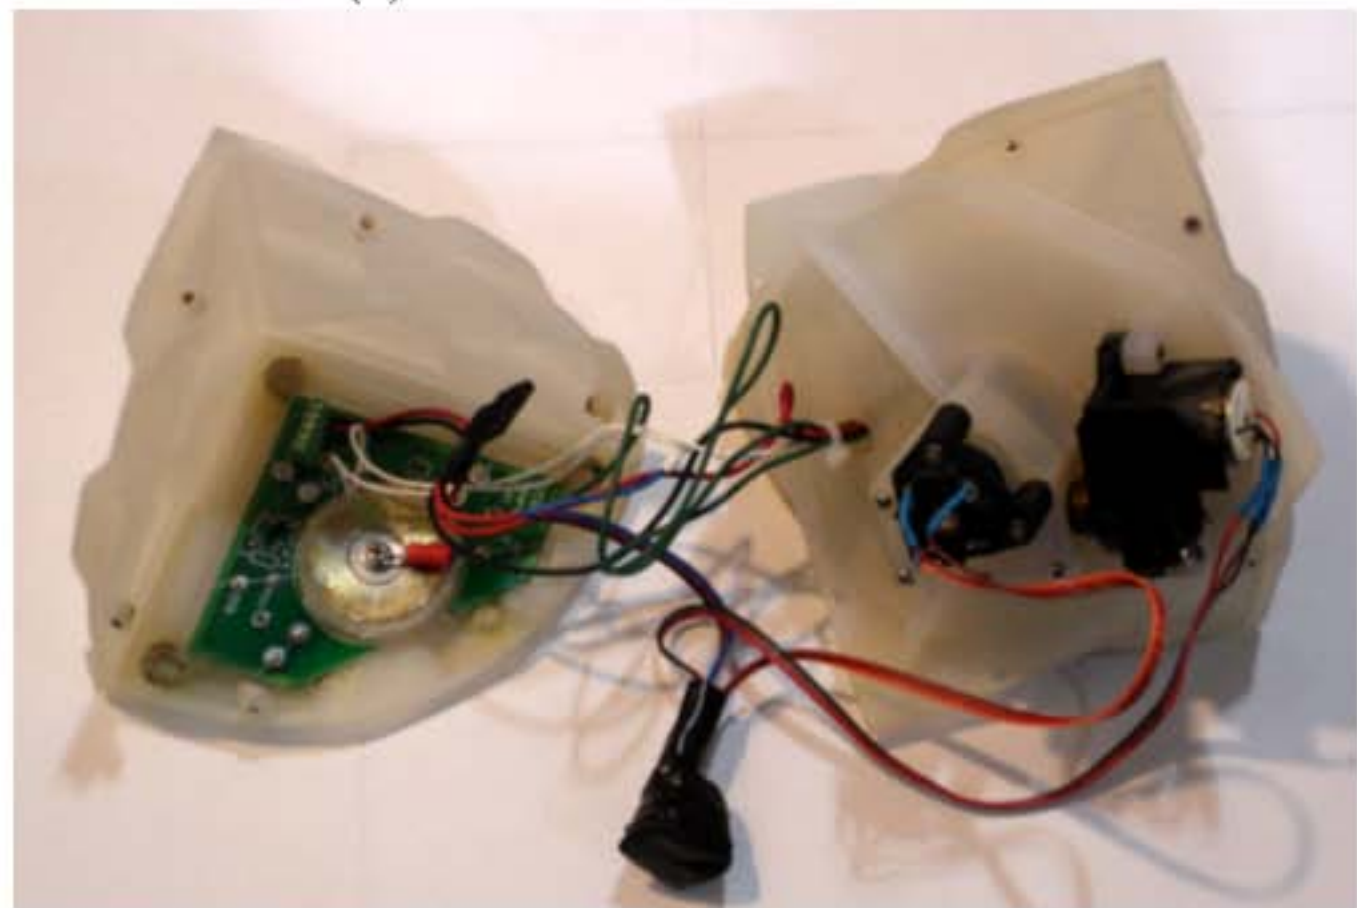

(d)

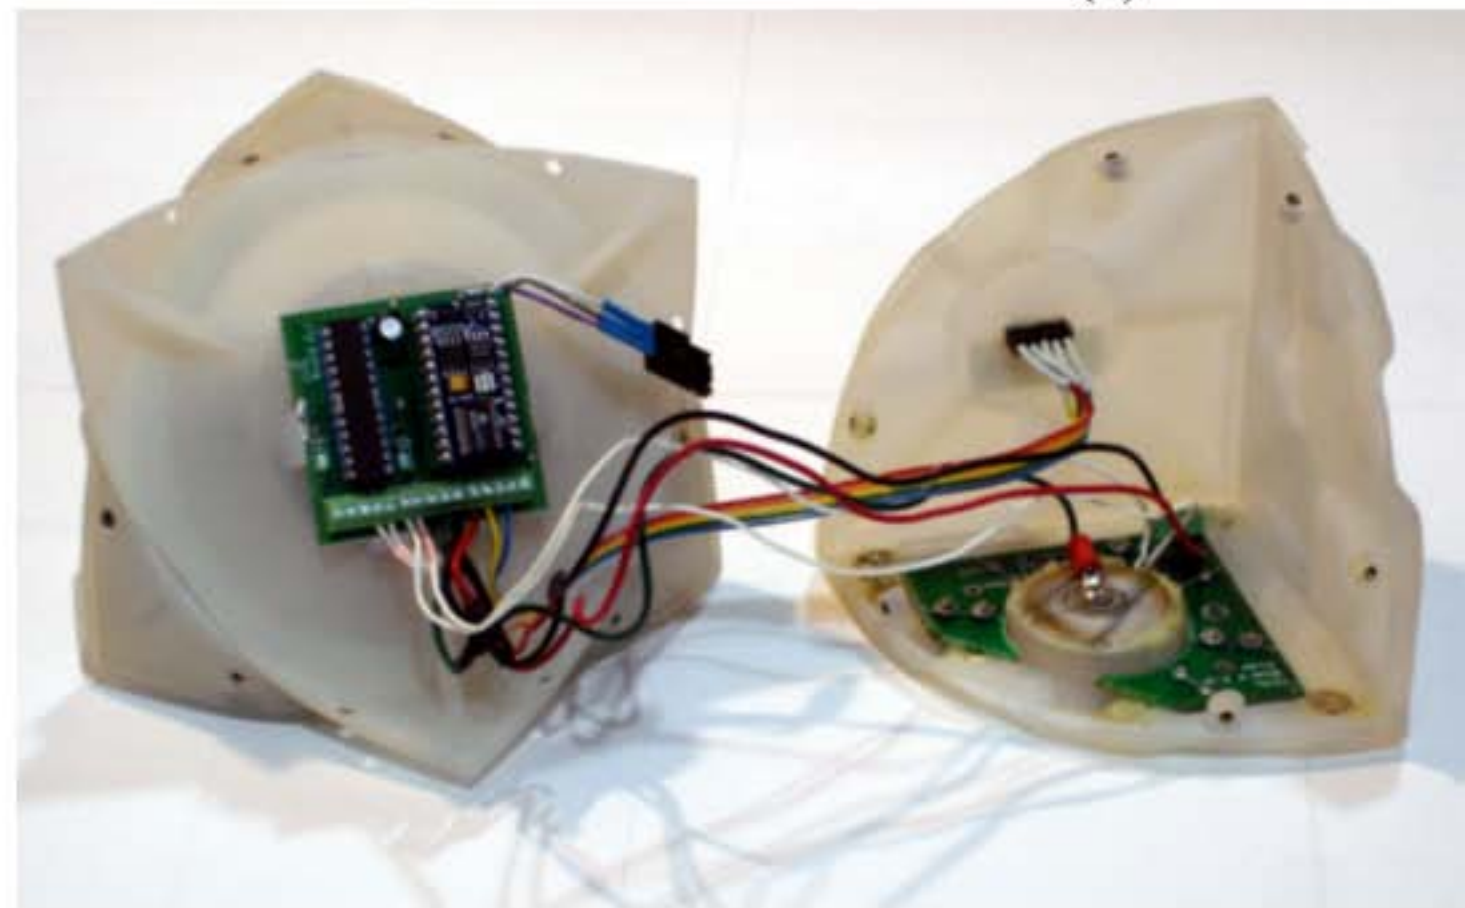

(e)
